# Supplementary material for: Acetylation of H3K115 is detected associated with fragile nucleosomes at CpG island promoters and active regulatory sites
Source: eLife journal article supplement (doi:10.7554/elife.108802), 2025-11-10
Supplement: fig4-data1 [file Figure_4_Source_Data_1.pdf › Figure_4_Source_Data_1.pdf]

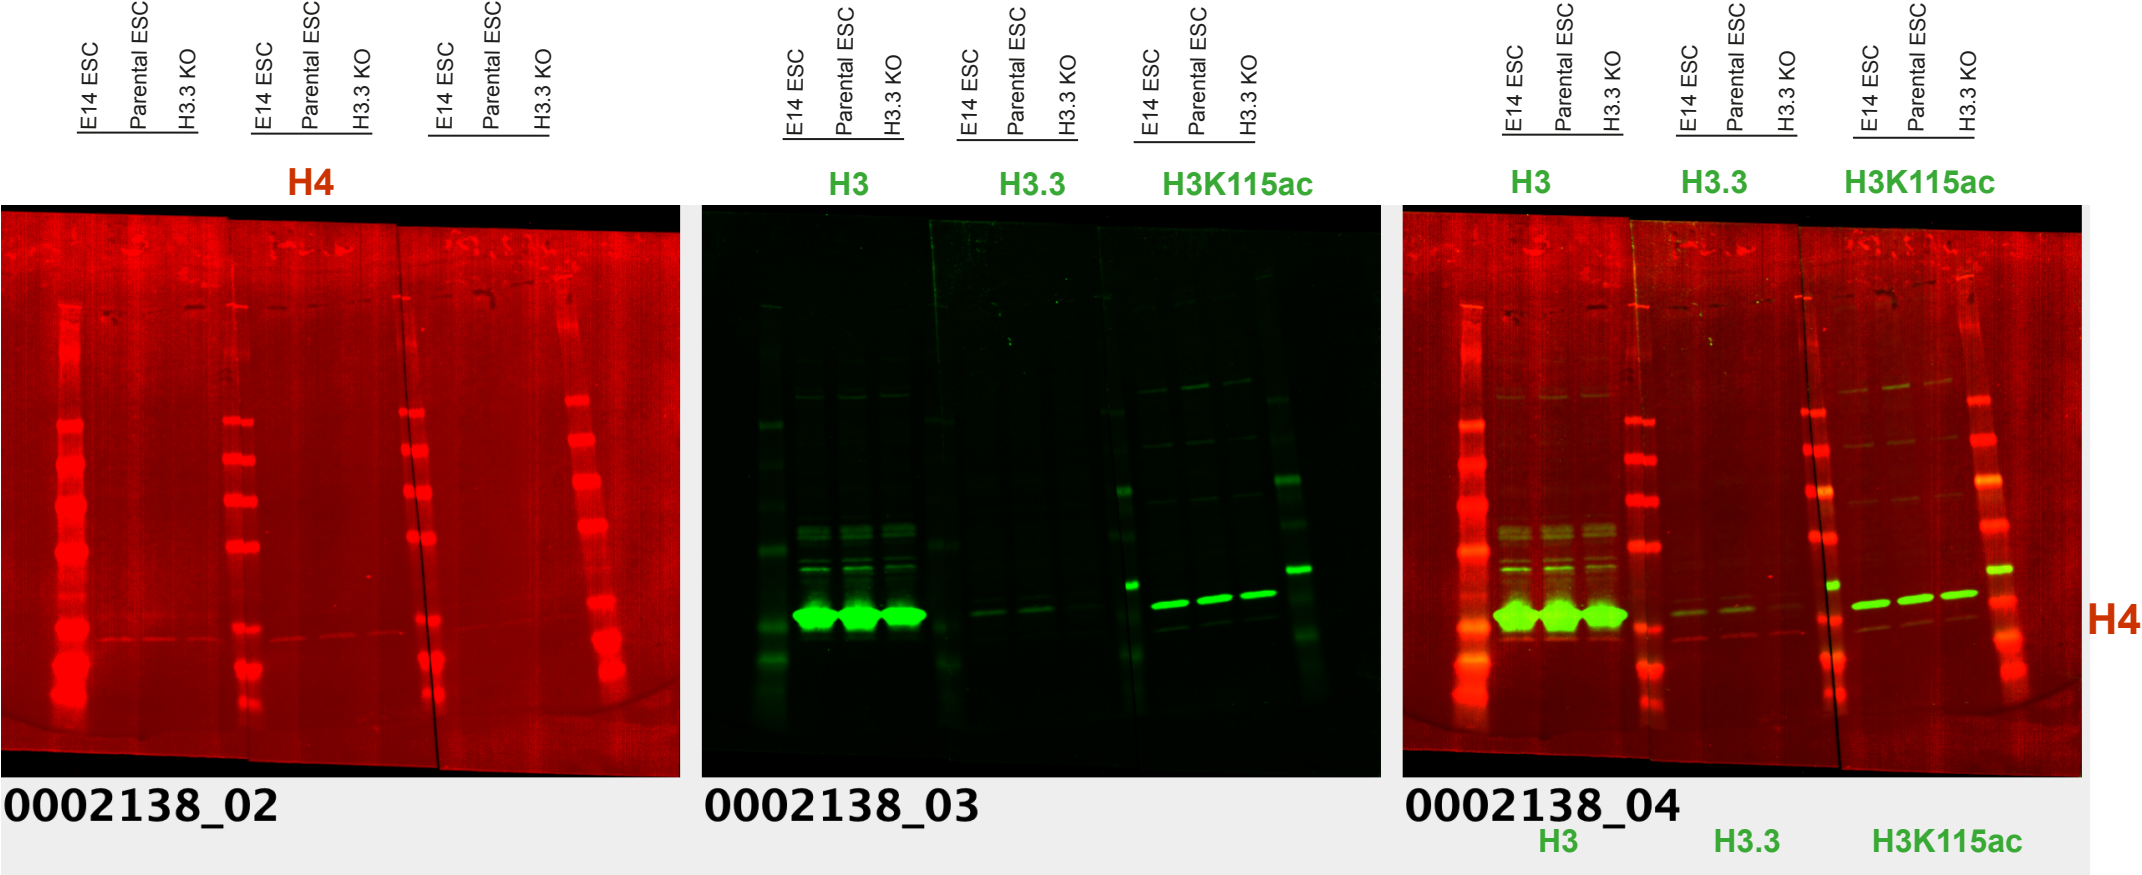

Images Table - All Images

| # | Image ID   | Acquire Time          | Channels          | Resolution  | Intensities | Image Name | Comment |
|---|------------|-----------------------|-------------------|-------------|-------------|------------|---------|
| 1 | 0002138_02 | 31 Jul 2024, 13:10:21 | 700, 800, RGB Epi | 100 $\mu$ m |             | 0002138    |         |
| 2 | 0002138_03 | 31 Jul 2024, 13:10:21 | 700, 800, RGB Epi | 100 $\mu$ m |             | 0002138    |         |
| 3 | 0002138_04 | 31 Jul 2024, 13:10:21 | 700, 800, RGB Epi | 100 $\mu$ m |             | 0002138    |         |

Image Display Values

| Image ID   | Channel | Color (Hex Code) | Minimum  | Maximum | K | Opacity | Saturation | Blend |
|------------|---------|------------------|----------|---------|---|---------|------------|-------|
| 0002138_02 | 700     | Red (#ff0000)    | 0.000762 | 30.6    | 0 | 1       | N/A        | N/A   |
| 0002138_03 | 800     | Green (#00ff00)  | 0.0973   | 4.26    | 0 | 1       | N/A        | N/A   |
| 0002138_04 | 700     | Red (#ff0000)    | 5.34     | 32.9    | 0 | 1       | N/A        | N/A   |
| 0002138_04 | 800     | Green (#00ff00)  | 0.184    | 2.63    | 0 | 1       | N/A        | N/A   |
