# Supplementary material for: Acetylation of H3K115 is associated with fragile nucleosomes at CpG island promoters and active regulatory sites
Source: eLife. 2026 Mar 4;14:RP108802. doi: 10.7554/eLife.108802 (PMC12959880; doi:10.7554/eLife.108802)
Supplement: Supplementary file 1. — Data are available in NCBI GEO with the Accession number GSE246191. [file elife-108802-supp1.xlsx]

## Sheet: supp file_1
Two Biological Replicates	Pearson's Correlation (r)	Sequencing format
H3K27ac_mESC_peChIP	0.9945	Paired end
H3K27ac_mESC_peChIP_INPUT	0.9992	Paired end
H3K115ac_mESC_peChIP	0.9905	Paired end
H3K115ac_mESC_peChIP_INPUT	0.9993	Paired end
H3K115ac_mESC_seChIP	0.9684	Single end
H3K115ac_NPC-day7_seChIP	0.904	Single end
ATAC-seq_mESC	0.9369	Paired end
ATAC-seq_NPC-day7	0.9528	Paired end
