# Supplementary material for: Acetylation of H3K115 is associated with fragile nucleosomes at CpG island promoters and active regulatory sites
Source: eLife. 2026 Mar 4;14:RP108802. doi: 10.7554/eLife.108802 (PMC12959880; doi:10.7554/eLife.108802)
Supplement: Supplementary file 2. — (a) Association of gain/loss of H3K115ac with transcriptional changes (up or down) during embryonic stem cell (ESC) to neural progenitor cell (NPC) differentiation for: All promoters, and promoters with or without CpG islands (CGIs). The number of genes is indicated. Data relevant to Figure 2B. (b) As in (a) but also for bivalent genes from Seneviratne et al., 2024, and including promoters of genes that show no change (nc) in H3K115ac during differentiation. (c) Association of H3K115ac, H3K64ac, H3K122ac, and H3K27ac post-translational modification (PTM) ChIP-seq peaks in mESCs with: All CGI promoters, promoters of bivalent genes from Seneviratne et al., 2024, promoters occupied by Ezh2. Data relevant to Figure 2—figure supplement 1D. [file elife-108802-supp2.xlsx]

## Sheet: Supplementary_file_2a
All promoters
Categories	number of genes	log2 (observed/expected)	p-value	Interpretation
Gain ~ up	517	1	2.02e-57	Significant positive enrichment
Gain ~ down	215	-0.42	0.000102	Significant negative enrichment
Loss ~ up	163	-0.15	0.769	Negative enrichment, not significant
Loss ~ down	524	1.39	2.93e-111	Significant positive enrichment
Promoters with CGI
Categories	number of genes	log2 (observed/expected)	p-value	Interpretation
Gain ~ up	374	0.78	1.21e-25	Significant positive enrichment
Gain ~ down	187	-0.28	0.000305	Significant negative enrichment
Loss ~ up	150	-0.06	0.337	Negative enrichment, not significant
Loss ~ down	385	1.24	4.44e-59	Significant positive enrichment
Promoters without CGI
Categories	number of genes	log2 (observed/expected)	p-value	Interpretation
Gain ~ up	168	1.8	2.33e-52	Significant positive enrichment
Gain ~ down	28	-1.06	3.08e-06	Significant negative enrichment
Loss ~ up	13	-1.19	0.00053	Significant negative enrichment
Loss ~ down	139	1.95	1.93e-51	Significant positive enrichment

## Sheet: Supplementary_file_2b
Categories	log2 (observed/expected)	p-value	Interpretation
ncK115_down	-0.13	0.44	not significant
ncK115_nc	0.14	5.7e-14	Mild but significant enrichment
ncK115_up	1.95	1.6e-91	Strong and significant enrichment
upK115_nc	0.89	4.5e-18	Strong and significant enrichment
upK115_up	1.95	6.2e-22	Strong and significant enrichment
downK115_down	0.16	0.58	not significant
downK115_nc	1.23	9.5e-49	Strong and significant enrichment

## Sheet: Supplementary_file_2c
All promoters with a CGI
PTM	log2 (observed/expected)	p-value	Interpretation
H3K115ac	0.9116	0	positive and significant enrichment
H3K64ac	0.60291	0	positive and significant enrichment
H3K122ac	0.00617531	0 4399634	mild but insignificant enrichment
H3K27ac	-1.09883	0	negative and significant enrichment
Bivalent genes (Seneviratne et. al., 2024)
PTM	log2 (observed/expected)	p-value	Interpretation
H3K115ac	0.920052	2.79e-280	positive and significant enrichment
H3K64ac	0.692893	2.75e-222	positive and significant enrichment
H3K122ac	0.255609	1.16e-46	mild and significant enrichment
H3K27ac	-1.87316	0	negative and significant enrichment
all genes occupied by EZH2
PTM	log2 (observed/expected)	p-value	Interpretation
H3K115ac	0.925373	0	positive and significant enrichment
H3K64ac	0.612832	0	positive and significant enrichment
H3K122ac	0.00886519	0.404726	mild but insignificant enrichment
H3K27ac	-1.13706	0	negative and significant enrichment
