# Supplementary material for: Acetylation of H3K115 is associated with fragile nucleosomes at CpG island promoters and active regulatory sites
Source: eLife. 2026 Mar 4;14:RP108802. doi: 10.7554/eLife.108802 (PMC12959880; doi:10.7554/eLife.108802)
Supplement: Supplementary file 3. — (a) Statistical data (Wilcox test) for data in Figure 3—figure supplement 1D comparing paired-end fragment length between H3K115ac and H3K27ac chromatin immunoprecipitation (ChIP) with the relevant input chromatin (for two biological replicates). (b) Statistical data (Wilcox test) for data in Figure 3—figure supplement 1E comparing AT content between ChIP-seq mono- or subnucleosome-sized paired-end fragment lengths for H3K115ac or H3K27ac ChIP data. [file elife-108802-supp3.xlsx]

## Sheet: Supp_File_3a
p values (Wilcox test) fragment length distributions
Distribution_1	Distribution2	p. Value	related figure
H3K115ac ChIP Replicate 1	H3K115ac Input Replicate 1	8.03447e-132	Figure 3_figure supplement 1D
H3K115ac ChIP Replicate 2	H3K115ac Input Replicate 2	1.22675e-67	Figure 3_figure supplement 1D
H3K27ac ChIP Replicate 1	H3K27ac Input Replicate 1	3.9565e-08	Figure 3_figure supplement 1D
H3K27ac ChIP Replicate 2	H3K27ac Input Replicate 2	0.294665	Figure 3_figure supplement 1D

## Sheet: Supp_File_3b
p values (Wilcox test) AT content distributions
Distribution_1	Distribution2	p. Value	related figure
ChIP_subNuc_H3K115ac	ChIP_subNuc_H3K27ac	1.97225e-08	Figure 3_figure supplement 1E
ChIP_monoNuc_H3K115ac	ChIP_monoNuc_H3K27ac	3.49173e-23	Figure 3_figure supplement 1E
ChIP_monoNuc_H3K115ac	ChIP_subNuc_H3K115ac	0.390156	Figure 3_figure supplement 1E
ChIP_monoNuc_H3K27ac	ChIP_subNuc_H3K27ac	0.0364241	NA
Input_monoNuc_H3K115ac	Input_monoNuc_H3K27ac	0.158215	Figure 3_figure supplement 1E
Input_subNuc_H3K115ac	Input_subNuc_H3K27ac	0.364145	Figure 3_figure supplement 1E
