# Supplementary material for: Acetylation of H3K115 is associated with fragile nucleosomes at CpG island promoters and active regulatory sites
Source: eLife. 2026 Mar 4;14:RP108802. doi: 10.7554/eLife.108802 (PMC12959880; doi:10.7554/eLife.108802)
Supplement: Supplementary file 4. — (a) Sequences of (top) guide RNAs to excise the exon 2 of H3f3a and exons 3 and 4 of H3f3b and (below) genotyping primers for H3.3KO DPY30-miniAID mouse embryonic stem cells (mESCs) (Wang et al., 2023). [file elife-108802-supp4.xlsx]

## Sheet: supp_file 4a
sgRNAs used in generation of H3.3 KO line (Figure 4D)
H3f3a_sgRNA1_F	CACCgattaatttccagatttggg
H3f3a_sgRNA1_R	AAACcccaaatctggaaattaatc
H3f3a_sgRNA2_F	CACCgagaccagtaaagttcccaa
H3f3a_sgRNA2_R	AAACttgggaactttactggtctc
H3f3b_sgRNA1_F	CACCgaccgcggtcctaaaagcca
H3f3b_sgRNA1_R	AAACtggcttttaggaccgcggtc
H3f3b_sgRNA2_F	CACCgccattccagagattggtga
H3f3b_sgRNA2_R	AAACtcaccaatctctggaatggc
Genotyping primers used in generation of H3.3 KO line (Figure 4D)
Gene	Forward	Reverse
H3f3a	gtgtttgtggcttcgttcatt	agccctgccttctaaacatac
H3f3b	gaagagctccctagtgctaaac	cagtcagtcactcttcccattc

## Sheet: supp_file_4b
PCR Primer Sequences for Figure 1-figure supplement 1B
Primer ID	Sequence
Universa_Forward	CGTCGAACGCGCGATAT
Unmodified_Rev	TCGAATCGTTCGCGTAATC
H3K4ac_Rev	CGCGATTCGCGTAATACG
H3K9ac_Rev	ACGCGAAACGACGAATC
H3K9bu_Rev	GAATCGTCGACGCGTATA
H3K9cr_Rev	ATTCGCGCGTACGTATAC
H3K14ac_Rev	CGAAATTCGTATACGCGTCG
H3K18ac_Rev	CGCGTAACGACGTACC
H3K18bu_Rev	GCGACGCGTAATCGA
H3K18cr_Rev	GCGATCGCGCGAATA
H3K23ac_Rev	ACGCGTCGAAACGATTA
H3K27ac_Rev	CGTATACGCGCGACA
H3K27bu_Rev	TACGCGCGAATTTACGTC
H3K27cr_Rev	GAACGTTCGTCGACGAT
H3K36ac_Rev	TCGCGCGTACGAAAC
H4K5ac_Rev	CGAATTTCGCGCGTATTAC
H4K8ac_Rev	CGCGAACTATCGTCGATTC
H4K12ac_Rev	ATACGACGAGATAGTCGACG
H4K16ac_Rev	GTCGATTATCGCGACGTAA
H4K20ac_Rev	GTGATATCGCGTTAACGTCG
H3K27acS28ph_Rev	TATCGCGCGAAACGAC
tetraAc-H3_(K4/9/14/18ac)_Rev	GTACCGCGCGTATCG
tetraAc-H4_(K5/8/12/16ac)_Rev	TCGCATCGCCGAATC
tetraAc-H2A_(K5/8/13/15ac)_Rev	TAATCGACGCGTTACGC
KLF4_Promoter_For	CACTCGAGAGCGCGATTAT
KLF4_Promoter_Rev	CTTCTCCTAGCTTCTGAGATTCC
KLF4_gene_body_For	GTAGTGCCTGGTCAGTTCATC
KLF4_gene_body_Rev	GCCCGTTCTCTTTCCCTTTA
