# Supplementary figures and images for: Acetylation of H3K115 is detected associated with fragile nucleosomes at CpG island promoters and active regulatory sites
Source: eLife journal article supplement (doi:10.7554/elife.108802), 2025-11-10

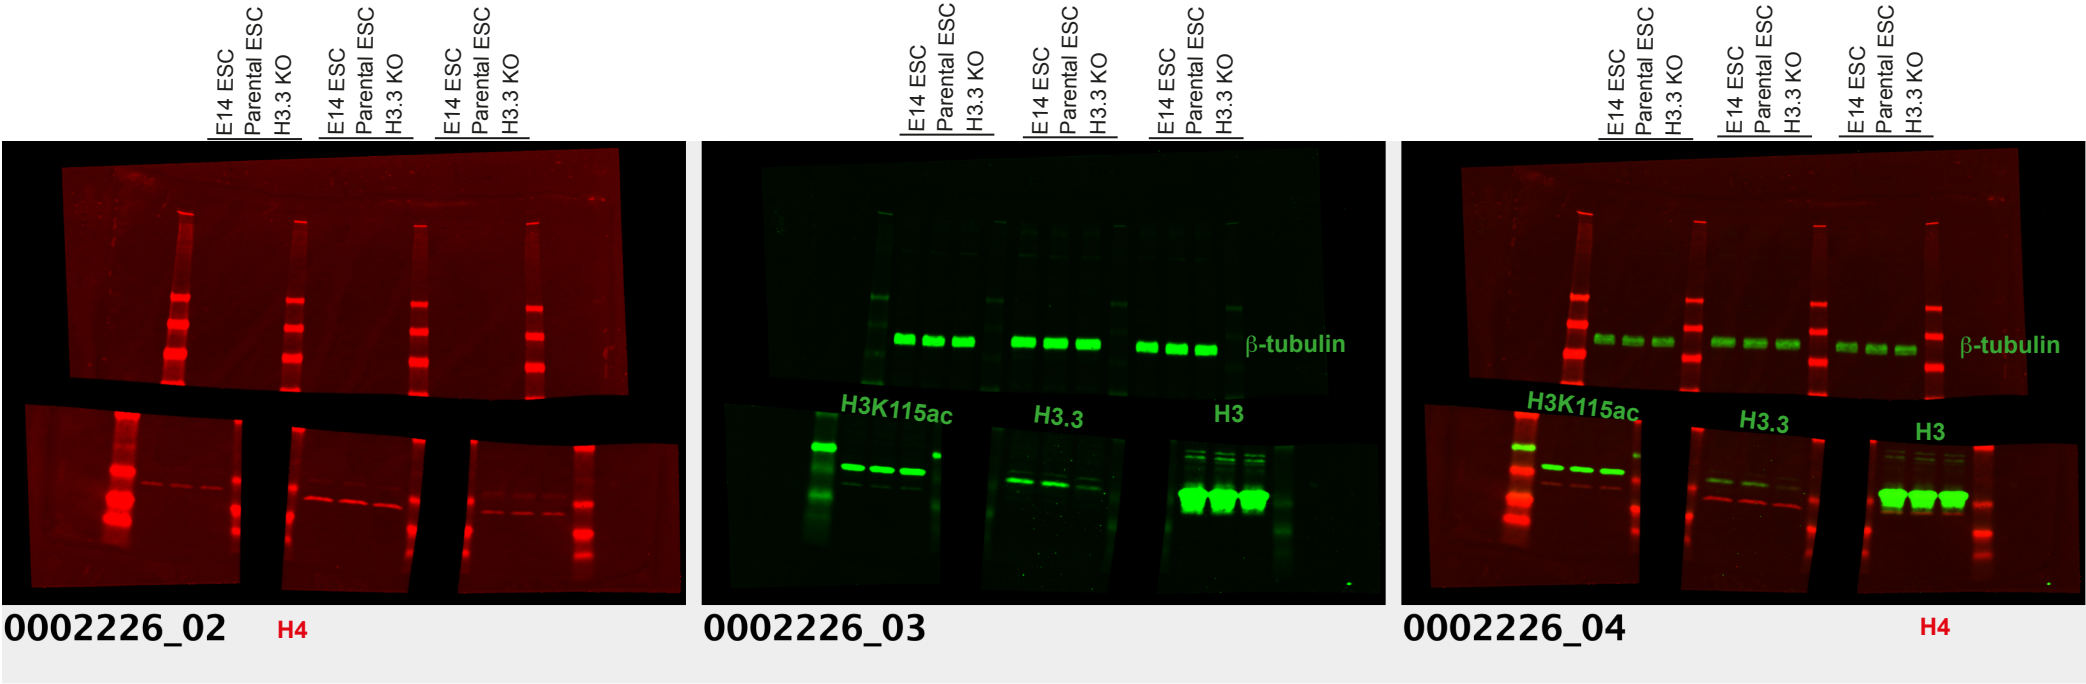

Supplement: fig4-figsupp1-data1 [file Figure_4_figureSupplement_Source_data_1.pdf › Figure_4_figureSupplement_Source_data_1.pdf]
